# Supplementary material
Source: publisher figshare collection journal article supplement (https://springernature.figshare.com/ndownloader/files/13836770)
Supplement: Supplementary file [file 13836770]

## Supplementary Figures and Legends

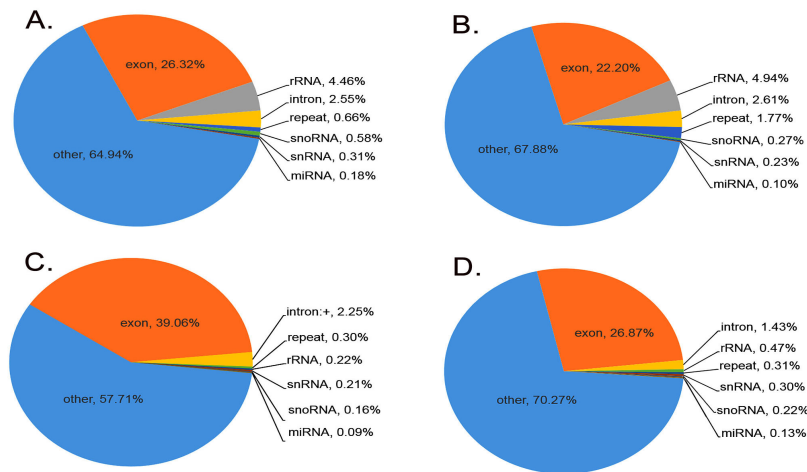

**Figure S1.** Classification of the sequenced small RNA in *T. rubrum*. (A) Total sequences in conidial stage. (B) Total sequences in mycelial stage. (C) Unique sequences in conidial stage. (D) Unique sequences in mycelial stage.

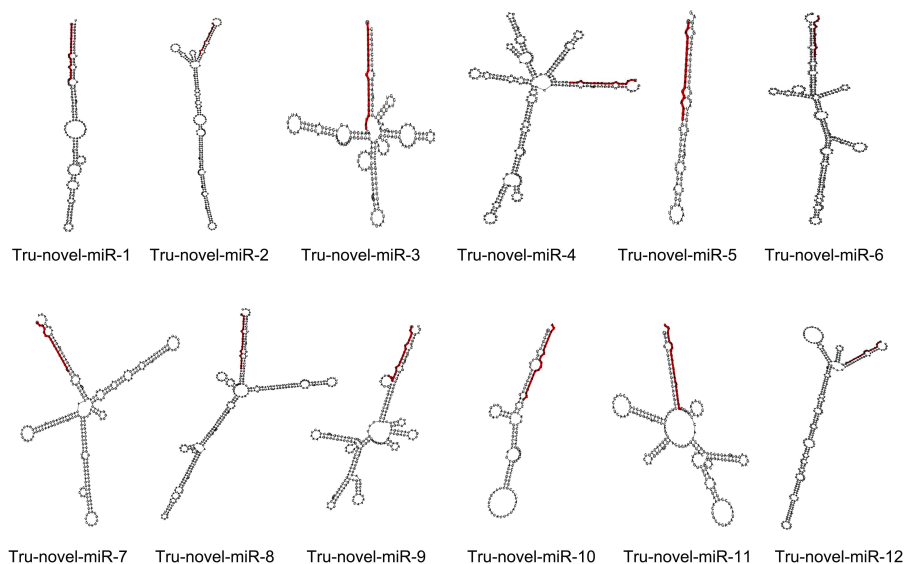

**Figure S2.** Secondary structures of the predicted precursor of novel miRNAs in *T. rubrum*. Sequences of mature miRNAs are shown in red.
